# Supplementary material for: Associations between the Expression of Mucins (MUC1, MUC2, MUC5AC, and MUC6) and Clinicopathologic Parameters of Human Breast Ductal Carcinomas
Source: PubMed Central journal article supplement — J Breast Cancer. 2013 Jun 28;16(2):152–8. doi: 10.4048/jbc.2013.16.2.152 (PMC3706859; doi:10.4048/jbc.2013.16.2.152), 2013-06-28
Supplement: jbc-16-152-s001.pdf [file jbc-16-152-s001.pdf]

**Supplementary Table 1.** Mucin expression and clinicopathological parameters of invasive ductal carcinomas

|                                  |   | MUC1     |          |                 | MUC2     |          |                 | MUC5AC   |          |                 | MUC6     |          |                 |
|----------------------------------|---|----------|----------|-----------------|----------|----------|-----------------|----------|----------|-----------------|----------|----------|-----------------|
|                                  |   | Positive | Negative | <i>p</i> -value |
| Vascular invasion <sup>†</sup>   | + | 14       | 3        | 0.082           | 1        | 16       | 1.000           | 1        | 15       | 0.561           | 3        | 14       | 0.452           |
|                                  | - | 192      | 11       |                 | 13       | 197      |                 | 10       | 201      |                 | 25       | 183      |                 |
| Distant metastasis <sup>†</sup>  | + | 50       | 2        | 0.526           | 2        | 50       | 0.525           | 2        | 49       | 1.000           | 8        | 43       | 0.279           |
|                                  | - | 140      | 12       |                 | 12       | 147      |                 | 7        | 153      |                 | 16       | 142      |                 |
| T stage <sup>†</sup>             | 1 | 58       | 5        | 0.881           | 3        | 65       | 0.372           | 3        | 63       | 0.917           | 6        | 59       | 0.230           |
|                                  | 2 | 130      | 7        |                 | 9        | 127      |                 | 7        | 131      |                 | 18       | 120      |                 |
|                                  | 3 | 18       | 2        |                 | 2        | 19       |                 | 1        | 20       |                 | 4        | 17       |                 |
|                                  | - | 173      | 6        |                 | 13       | 171      |                 | 9        | 175      |                 | 23       | 160      |                 |
| EIC <sup>†</sup>                 | + | 36       | 1        | 0.474           | 1        | 38       | 0.474           | 2        | 36       | 0.896           | 6        | 32       | 0.493           |
|                                  | - | 170      | 13       |                 | 13       | 175      |                 | 9        | 180      |                 | 22       | 165      |                 |
| Necrosis <sup>†</sup>            | + | 87       | 7        | 0.570           | 4        | 92       | 0.404           | 6        | 90       | 0.399           | 16       | 81       | 0.109           |
|                                  | - | 119      | 7        |                 | 10       | 121      |                 | 5        | 126      |                 | 12       | 116      |                 |
| Perineural invasion <sup>†</sup> | + | 33       | 3        | 0.706           | 4        | 31       | 0.240           | 7        | 31       | 0.071           | 3        | 30       | 0.775           |
|                                  | - | 173      | 11       |                 | 10       | 182      |                 | 7        | 185      |                 | 25       | 167      |                 |
| Tumor border <sup>†</sup>        | + | 170      | 10       | 0.291           | 11       | 173      | 0.732           | 8        | 176      | 0.440           | 23       | 160      | 1.000           |
|                                  | - | 36       | 4        |                 | 3        | 40       |                 | 3        | 40       |                 | 5        | 37       |                 |
| CK5/6 <sup>†</sup>               | + | 25       | 3        | 0.387           | 1        | 26       | 1.000           | 2        | 28       | 0.652           | 4        | 23       | 0.751           |
|                                  | - | 174      | 10       |                 | 13       | 174      |                 | 9        | 178      |                 | 22       | 165      |                 |
| Paget's disease <sup>†</sup>     | + | 9        | 0        | 1.000           | 0        | 9        | 1.000           | 0        | 9        | 1.000           | 2        | 7        | 0.321           |

Some values were missed due to tissue loss.

EIC = extensive intraductal component; + = positive or present; - = negative or absent.

<sup>†</sup>Chi-square test and Fisher's exact test; <sup>†</sup>Linear by linear test
